# Supplementary material
Source: PubMed Central journal article supplement (PMC10687318)
Supplement: NIHMS1902549-supplement-2.pdf [file NIHMS1902549-supplement-2.pdf]

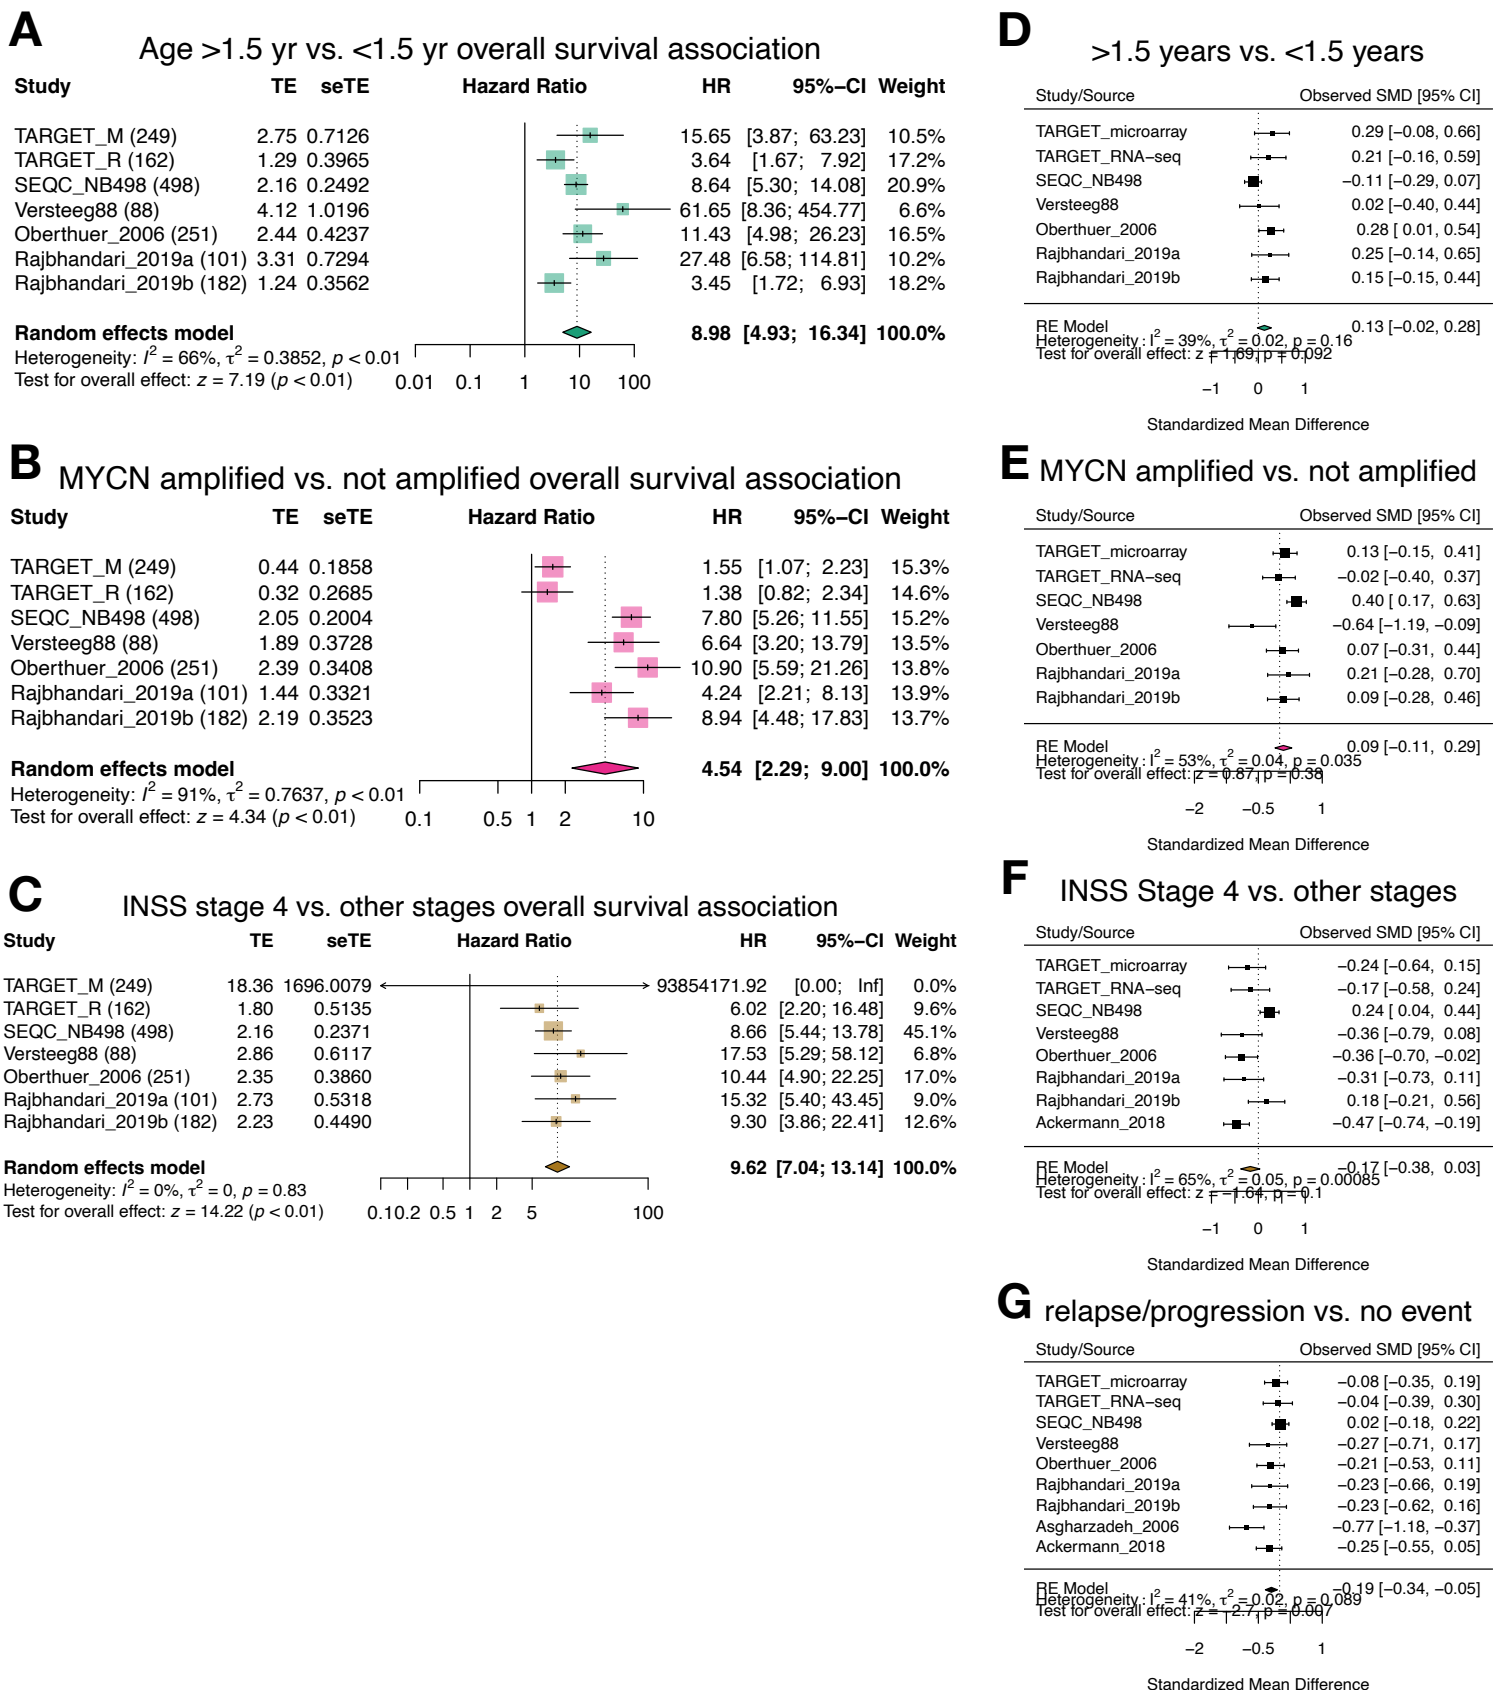

**Figure S2. Known NBL prognostic factors consistently associate with outcome across different NBL studies but not NE scores**

**A-C.** Age at diagnosis (**A**), MYCN amplification (**B**), and INSS stage 4 (**C**) are significantly associated with worse outcome. **D-G.** Meta-analyses of NE scores standardized mean difference between groups stratified by different clinical features. Age at diagnosis (**D**), MYCN amplification (**E**) and INSS stage 4 (**F**) are not significantly associated with NE scores. Lower NE scores are associated with relapse (**G**). Note that although one out of the nine studies showed a significant result, the overall result from the meta-analysis is statistically significant.
