# Supplementary material
Source: PubMed Central journal article supplement (PMC10687318)
Supplement: NIHMS1902549-supplement-3.pdf [file NIHMS1902549-supplement-3.pdf]

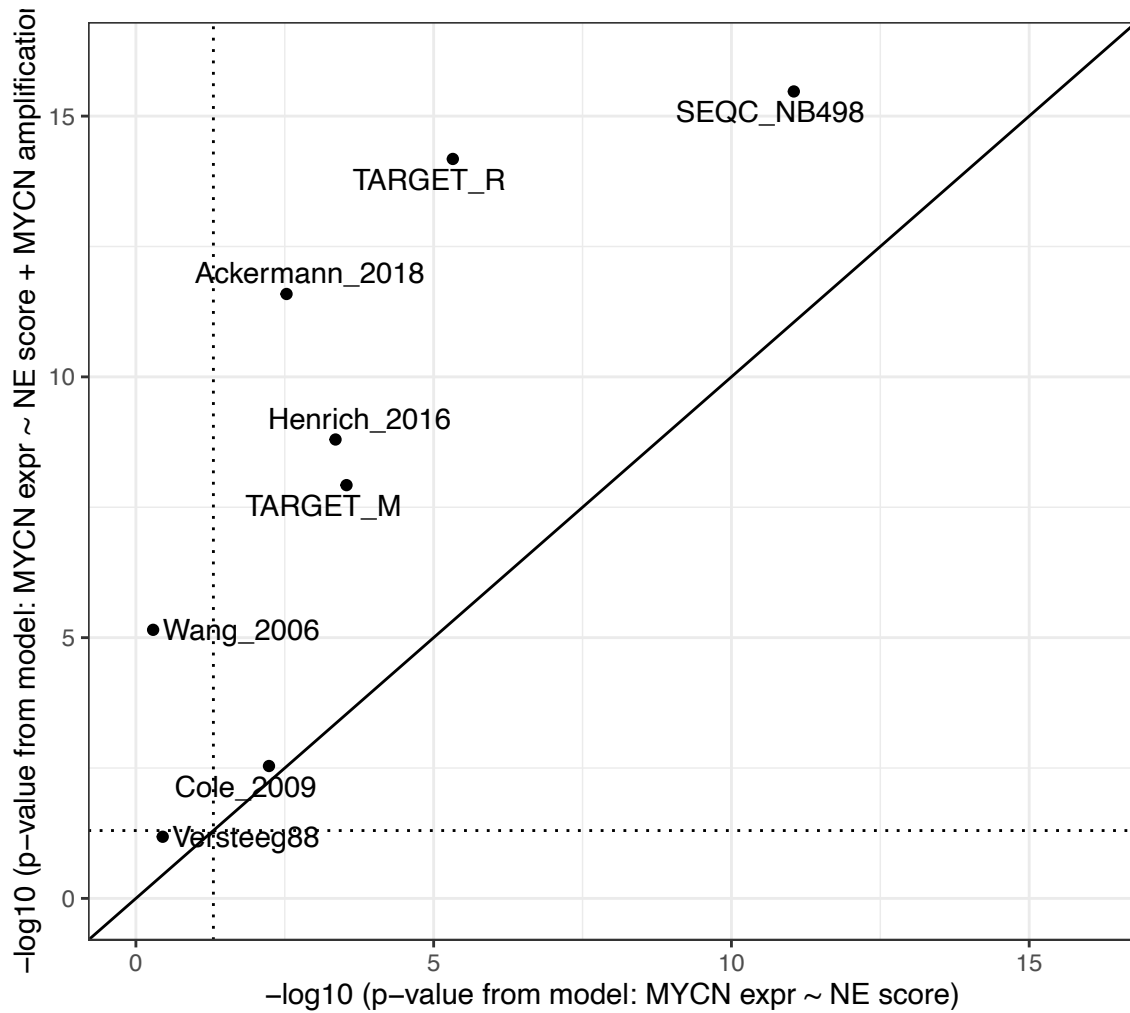

**Figure S3. Controlling for MYCN amplification status increases the statistical significance of NE score vs. MYCN expression association.**

X-axis values are p-values from a univariate linear model using NE score to predict MYCN expression, y-axis values are p-values from a multivariate linear model that included both NE score and MYCN amplification status as the predictor variables and MYCN expression as the response variable. For both models, p-values for the NE score term were extracted for comparison. Results from eight studies were included and study names were labeled on the plot. Dotted line indicates p-value = 0.05.
