# Supplementary material
Source: PubMed Central journal article supplement (PMC10687318)
Supplement: NIHMS1902549-supplement-5.pdf [file NIHMS1902549-supplement-5.pdf]

# SCLC

| drug                                     | COR (95%CI)         |
|------------------------------------------|---------------------|
| PD-0325901                               | 0.77 [ 0.53; 1.01]  |
| AZD6244                                  | 0.62 [ 0.25; 0.98]  |
| selumetinib:PLX-4032 (8:1 mol/mol)       | 0.43 [ 0.12; 0.73]  |
| selumetinib:GDC-0941 (4:1 mol/mol)       | 0.46 [ 0.17; 0.75]  |
| selumetinib:MK-2206 (8:1 mol/mol)        | 0.33 [-0.02; 0.69]  |
| selumetinib:UNC0638 (4:1 mol/mol)        | 0.28 [-0.08; 0.64]  |
| PD-318088                                | 0.30 [-0.04; 0.65]  |
| selumetinib:BRD-A02303741 (4:1 mol/mol)  | 0.22 [-0.14; 0.59]  |
| AZD6244                                  | 0.30 [-0.04; 0.63]  |
| selumetinib:tretinoin (2:1 mol/mol)      | 0.26 [-0.09; 0.60]  |
| selumetinib:navitoclax (8:1 mol/mol)     | -0.30 [-0.64; 0.05] |
| GSK1120212                               | 0.16 [-0.30; 0.62]  |
| selumetinib:JQ-1 (4:1 mol/mol)           | 0.22 [-0.16; 0.60]  |
| selumetinib:piperlongumine (8:1 mol/mol) | -0.22 [-0.59; 0.14] |
| selumetinib:vorinostat (8:1 mol/mol)     | 0.00 [-0.40; 0.40]  |
| selumetinib:decitabine (4:1 mol/mol)     | 0.12 [-0.26; 0.51]  |
| BAY 869766 (2)                           | 0.68 [ 0.50; 0.87]  |
| GSK1120212                               | 0.54 [ 0.30; 0.79]  |
| AZD6244 (2)                              | 0.51 [ 0.26; 0.77]  |
| PD-184352                                | 0.60 [ 0.38; 0.82]  |
| PD-0325901                               | 0.48 [ 0.22; 0.74]  |
| BAY 869766 (1)                           | 0.42 [ 0.14; 0.70]  |
| BIX 02189                                | 0.48 [ 0.23; 0.74]  |
| AZD6244 (1)                              | -0.18 [-0.51; 0.15] |
| GSK1120212                               | 0.47 [ 0.18; 0.76]  |
| PD-0325901                               | 0.39 [ 0.08; 0.70]  |
| PD-0325901                               | 0.59 [ 0.16; 1.02]  |
| PD-198306                                | 0.64 [ 0.26; 1.03]  |
| GSK1120212                               | 0.27 [-0.34; 0.87]  |
| Ro-4987655                               | 0.61 [ 0.21; 1.02]  |
| AZD6244                                  | 0.32 [-0.23; 0.88]  |
| AZD8330                                  | 0.34 [-0.22; 0.89]  |
| U-0124                                   | -0.29 [-0.89; 0.31] |
| nobiletin                                | -0.28 [-0.88; 0.32] |
| TAK-733                                  | 0.46 [-0.03; 0.95]  |
| MEK162                                   | 0.29 [-0.31; 0.89]  |
| MEK1-2-inhibitor                         | 0.08 [-0.57; 0.73]  |
| BIX 02189                                | 0.29 [-0.28; 0.86]  |
| BAY 869766                               | 0.05 [-0.60; 0.70]  |
| cobimetinib                              | 0.11 [-0.50; 0.73]  |
| arctigenin                               | -0.12 [-0.73; 0.49] |
| U-0126 (1)                               | 0.81 [ 0.58; 1.03]  |
| AS-703026                                | 0.65 [ 0.24; 1.05]  |
| PD-318088                                | 0.37 [-0.20; 0.93]  |
| U-0126 (2)                               | 0.15 [-0.52; 0.83]  |
| PD-98059                                 | -0.16 [-0.79; 0.48] |
| BIX-02188 (1)                            | -0.20 [-0.82; 0.43] |
| PD-184352                                | 0.24 [-0.38; 0.86]  |
| BIX-02188 (2)                            | -0.23 [-0.88; 0.43] |
| Total                                    | 0.33 [ 0.24; 0.41]  |

Heterogeneity:  $\chi^2_{48} = 119.04$  ( $P < .001$ ),  $I^2 = 60\%$

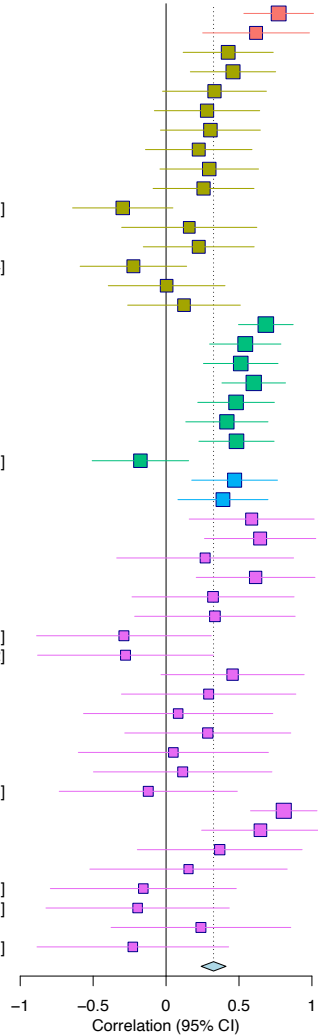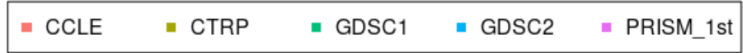

# NBL

| drug                                     | COR (95%CI)         |
|------------------------------------------|---------------------|
| PD-0325901                               | 0.62 [ 0.21; 1.02]  |
| AZD6244                                  | 0.67 [ 0.30; 1.03]  |
| selumetinib:PLX-4032 (8:1 mol/mol)       | 0.56 [ 0.16; 0.97]  |
| selumetinib:GDC-0941 (4:1 mol/mol)       | 0.50 [ 0.10; 0.89]  |
| selumetinib:MK-2206 (8:1 mol/mol)        | 0.55 [ 0.09; 1.01]  |
| selumetinib:UNC0638 (4:1 mol/mol)        | 0.59 [ 0.19; 0.99]  |
| PD-318088                                | 0.47 [ 0.06; 0.88]  |
| selumetinib:BRD-A02303741 (4:1 mol/mol)  | 0.62 [ 0.26; 0.98]  |
| AZD6244                                  | 0.44 [ 0.00; 0.88]  |
| selumetinib:tretinoin (2:1 mol/mol)      | 0.44 [-0.09; 0.97]  |
| selumetinib:navitoclax (8:1 mol/mol)     | -0.31 [-0.84; 0.23] |
| GSK1120212                               | 0.48 [-0.05; 1.01]  |
| selumetinib:JQ-1 (4:1 mol/mol)           | 0.26 [-0.25; 0.77]  |
| selumetinib:piperlongumine (8:1 mol/mol) | -0.01 [-0.63; 0.61] |
| selumetinib:vorinostat (8:1 mol/mol)     | -0.35 [-0.96; 0.25] |
| selumetinib:decitabine (4:1 mol/mol)     | -0.31 [-0.84; 0.23] |
| BAY 869766 (2)                           | 0.81 [ 0.56; 1.06]  |
| GSK1120212                               | 0.76 [ 0.51; 1.02]  |
| AZD6244 (2)                              | 0.73 [ 0.43; 1.04]  |
| PD-184352                                | 0.59 [ 0.20; 0.98]  |
| PD-0325901                               | 0.51 [ 0.07; 0.95]  |
| BAY 869766 (1)                           | 0.55 [ 0.13; 0.96]  |
| BIX 02189                                | 0.28 [-0.27; 0.82]  |
| AZD6244 (1)                              | 0.07 [-0.58; 0.72]  |
| GSK1120212                               | 0.58 [ 0.14; 1.01]  |
| PD-0325901                               | 0.50 [ 0.01; 0.99]  |
| PD-0325901                               | 0.69 [ 0.27; 1.11]  |
| PD-198306                                | 0.39 [-0.13; 0.92]  |
| GSK1120212                               | 0.70 [ 0.39; 1.02]  |
| Ro-4987655                               | 0.26 [-0.31; 0.84]  |
| AZD6244                                  | 0.47 [-0.01; 0.95]  |
| AZD8330                                  | 0.39 [-0.14; 0.91]  |
| U-0124                                   | -0.32 [-0.94; 0.29] |
| nobiletin                                | -0.33 [-0.95; 0.29] |
| TAK-733                                  | 0.18 [-0.49; 0.85]  |
| MEK162                                   | 0.28 [-0.33; 0.88]  |
| MEK1-2-inhibitor                         | 0.73 [ 0.40; 1.05]  |
| BIX 02189                                | 0.19 [-0.48; 0.86]  |
| BAY 869766                               | 0.70 [ 0.33; 1.08]  |
| cobimetinib                              | 0.20 [-0.47; 0.86]  |
| arctigenin                               | -0.11 [-0.79; 0.58] |
| U-0126 (1)                               | 0.01 [-0.68; 0.70]  |
| AS-703026                                | -0.01 [-0.70; 0.68] |
| PD-318088                                | -0.03 [-0.65; 0.59] |
| U-0126 (2)                               | -0.12 [-0.81; 0.56] |
| PD-98059                                 | 0.22 [-0.37; 0.81]  |
| BIX-02188 (1)                            | 0.32 [-0.24; 0.88]  |
| PD-184352                                | -0.35 [-0.92; 0.22] |
| BIX-02188 (2)                            | 0.37 [-0.22; 0.97]  |
| Total                                    | 0.39 [ 0.30; 0.48]  |

Heterogeneity:  $\chi^2_{48} = 90.53$  ( $P < .001$ ),  $I^2 = 47\%$

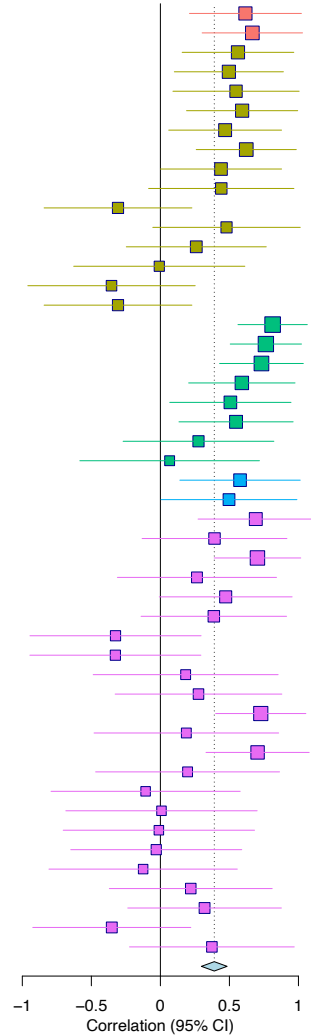

**Figure S5. A meta-analysis example that summarizes the association between MEK inhibitor resistance and NE scores**  
 Compounds that target MEK were identified from five different datasets. Correlation between therapeutic sensitivity of different MEK inhibitors and NE scores in SCLC and NBL cell lines were computed. These forest plots visualize the meta-analyses of these correlations in SCLC (left) and NBL (right). Sources of data were annotated in different colors. Datasets have been harmonized such that a positive correlation indicates cell lines with higher NE scores are more resistant.
