# Supplementary material
Source: PubMed Central journal article supplement (PMC10687318)
Supplement: NIHMS1902549-supplement-7.pdf [file NIHMS1902549-supplement-7.pdf]

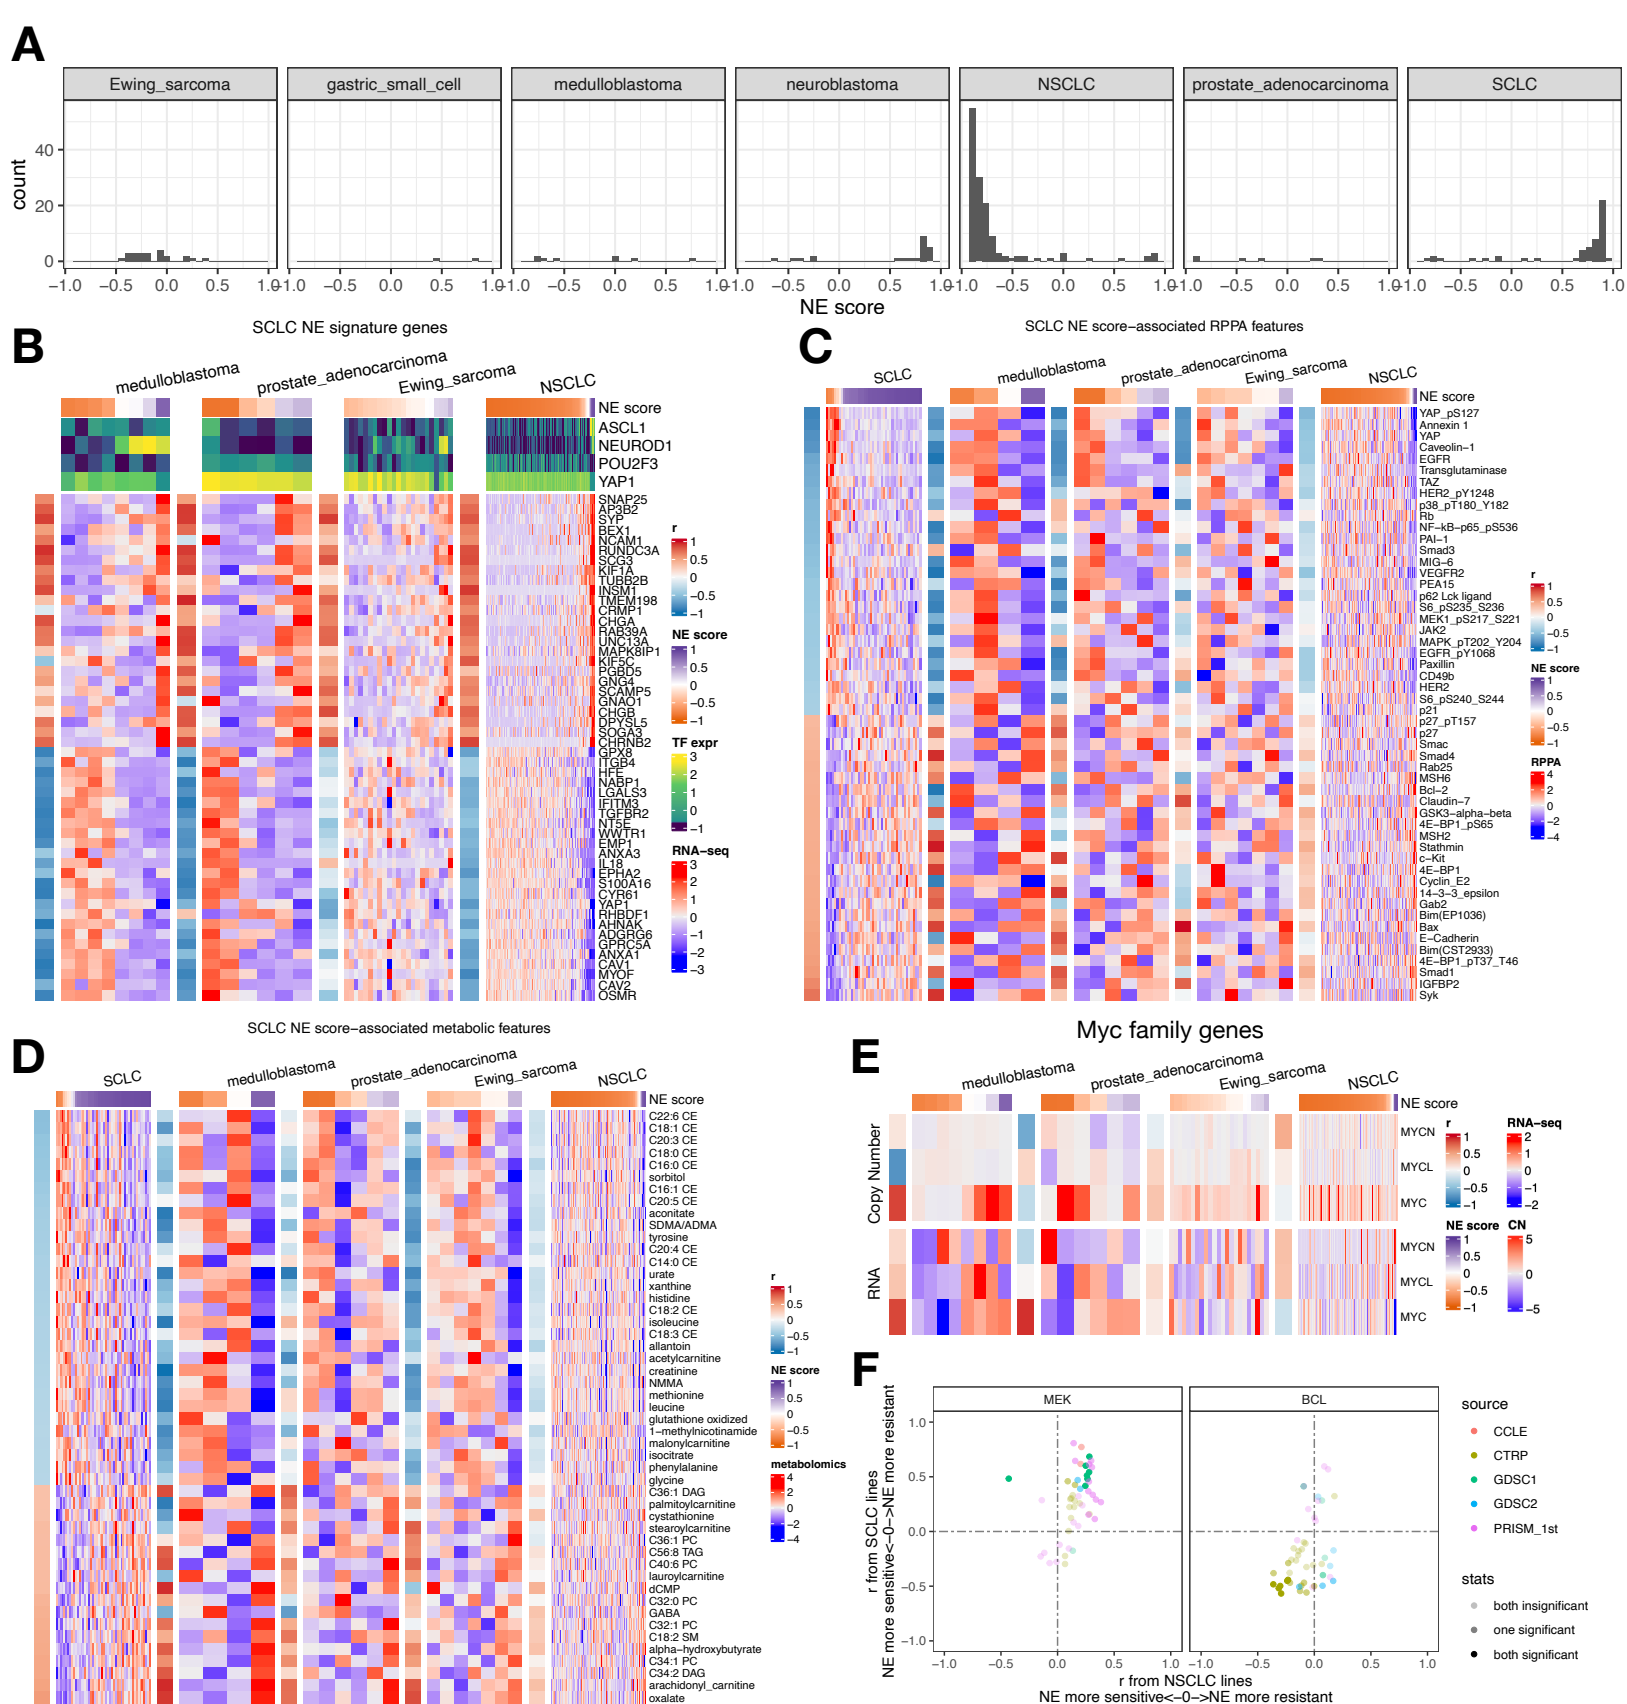

**Figure S7. Comparing NE score-associated features between SCLC and other cancer types**

**A**, Distribution of NE scores in lineage subtypes with at least two cell lines that have positive NE scores. Ewing sarcoma, medulloblastoma, NSCLC and prostate adenocarcinoma are selected for further analyses. **B**, SCLC NE signature gene expression in selected cell lines of selected cancer lineages. **C-D**, RPPA (**c**) and metabolomics (**D**) features that associate with NE scores in SCLC cell lines also associate with NE scores in cell lines of selected cancer lineages. **E**, Copy number and RNA expression of Myc family genes in cell lines of selected lineages. **F**, Correlation between NE scores and therapeutic sensitivity for drugs with selected targets. Drug sensitivity data was previously harmonized such that a higher value represents more resistance in each study. For each of the nine selected targets, all compounds with the same target were identified from multiple studies. Pearson correlation coefficient  $r$  from correlating compound data with NE scores were calculated for NSCLC lines (x-axis values) and SCLC lines (y-axis values) respectively and visualized as a scatter plot, with colors annotating the source of data, and transparency annotating the statistical significance.
